# Supplementary material for: Sensitivity of the MAR regional climate model snowpack to the parameterization of the assimilation of satellite-derived wet-snow masks on the Antarctic Peninsula
Source: Copernicus journal article supplement (doi:10.5194/tc-17-4267-2023), 2023-10-06
Supplement: Supplementary file 1 [file tc-17-4267-2023-supplement.pdf]

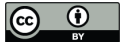

*Supplement of*

## **Sensitivity of the MAR regional climate model snowpack to the parameterization of the assimilation of satellite-derived wet-snow masks on the Antarctic Peninsula**

**Thomas Dethinne et al.**

*Correspondence to:* Thomas Dethinne (tdethinne@uliege.be)

The copyright of individual parts of the supplement might differ from the article licence.

Supplementary : 2020-2021 melt season

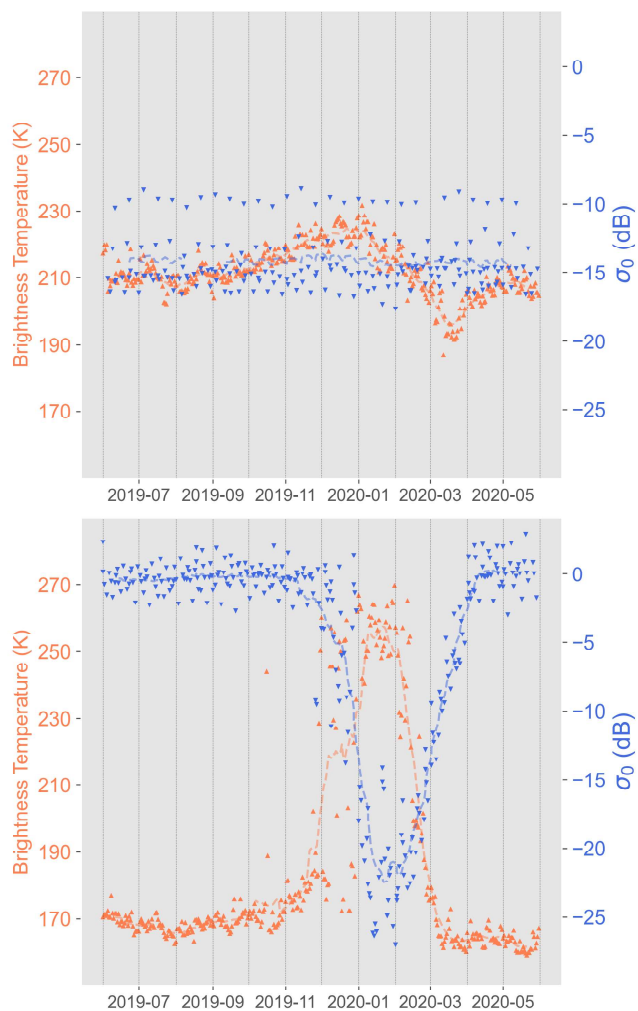

**Figure S 1.** Evolution of backscattering coefficient  $\sigma_0$  (in blue) and brightness temperature (orange) over the Larsen C ice shelf (top, 67.54°S 63.90°W) and the Wilkins coast (bottom, 68.08°S 65.86°W) over the 2019-2020 melt season. In a place where no melting is observed (top),  $\sigma_0$  and the brightness temperature show almost no changes. On the contrary, in areas subject to melt (bottom), we can observe a decrease of  $\sigma_0$  and an increase in the observed brightness temperature.

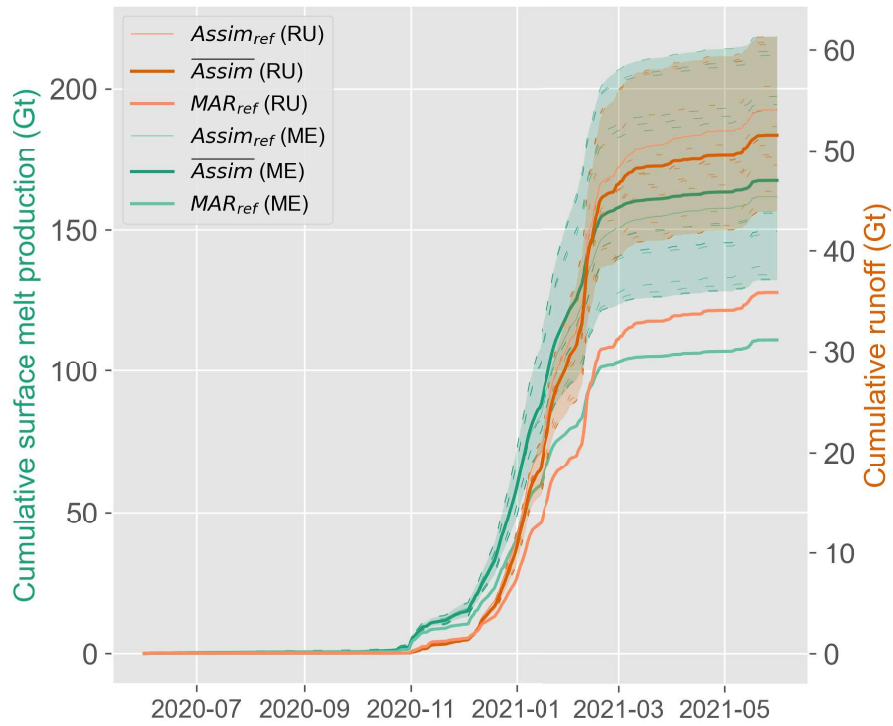

**Figure S 2.** Comparison between the cumulative surface meltwater production (Gt) in green and the cumulative runoff (Gt) in orange over the whole MAR domain (excluding ocean areas) for the 2020-2021 melt season as modeled by MAR without assimilation and with data assimilation. Shaded areas represent the range of the assimilations. While the increase in Gt is larger for meltwater production, the relative increase is similar for meltwater production and runoff.

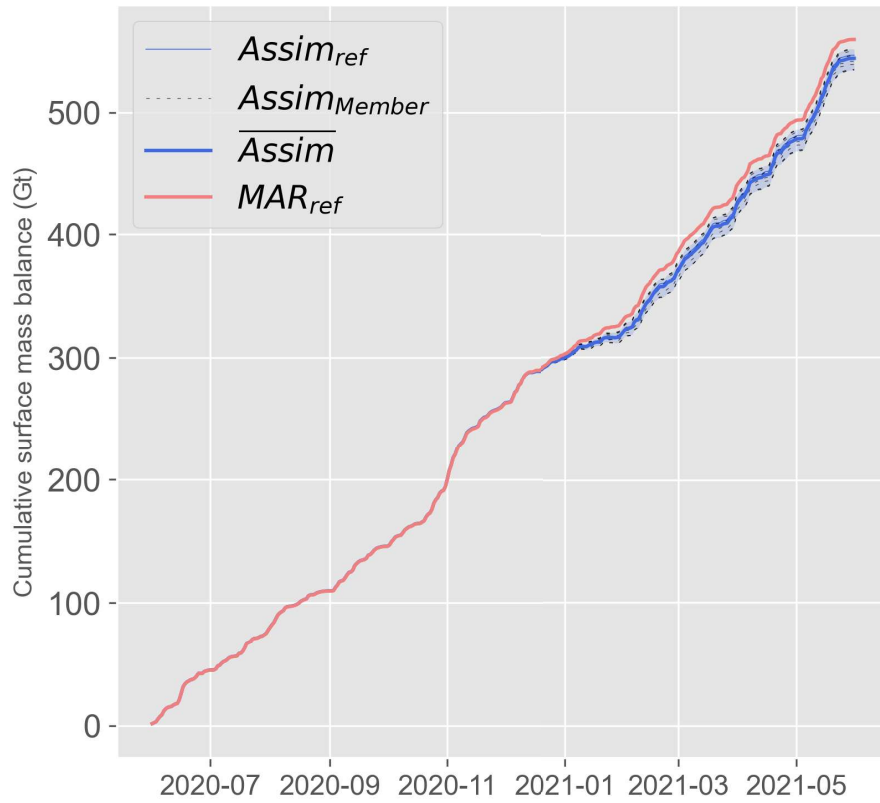

**Figure S 3.** Cumulative surface mass balance (Gt) over the entire MAR domain (excluding ocean areas) for the 2020-2021 melt season as modeled by MAR without assimilation ( $MAR_{ref}$  in red), with data assimilation ( $Assim_{member}$  in dashed lines), and their averaged value ( $\overline{Assim}$  in blue). Shaded areas represent the range of the assimilations. Despite the increase in surface melt production, the surface mass balance does not significantly decrease.

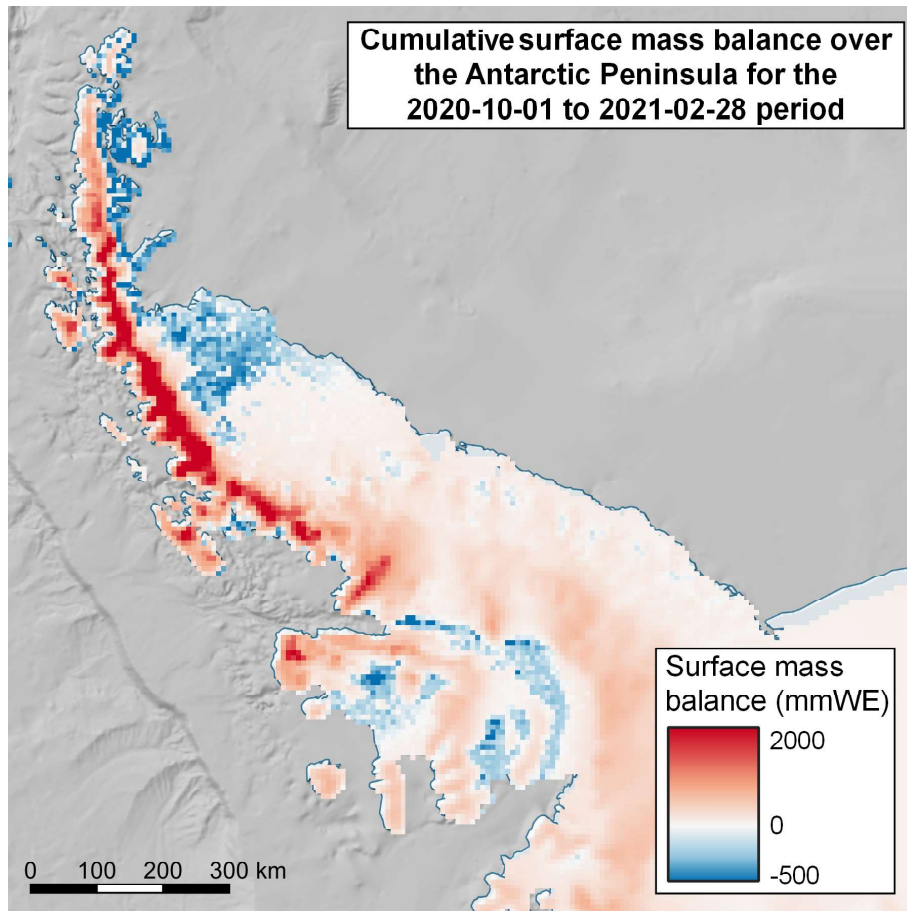

**Figure S 4.** Cumulative SMB (mmWE) from 2020-10-01 to 2021-02-28 over the AP as modeled by  $Assim_{ref}$ . Larsen C is outlined in purple, George VI in green, and Wilkins in red. The southern ice shelves and the northernmost coastlines are experiencing a negative SMB in contrast with the rest of the AP. Larsen C is divided in two regimes. Its northern part is experiencing a negative SMB while the southern part is positive.

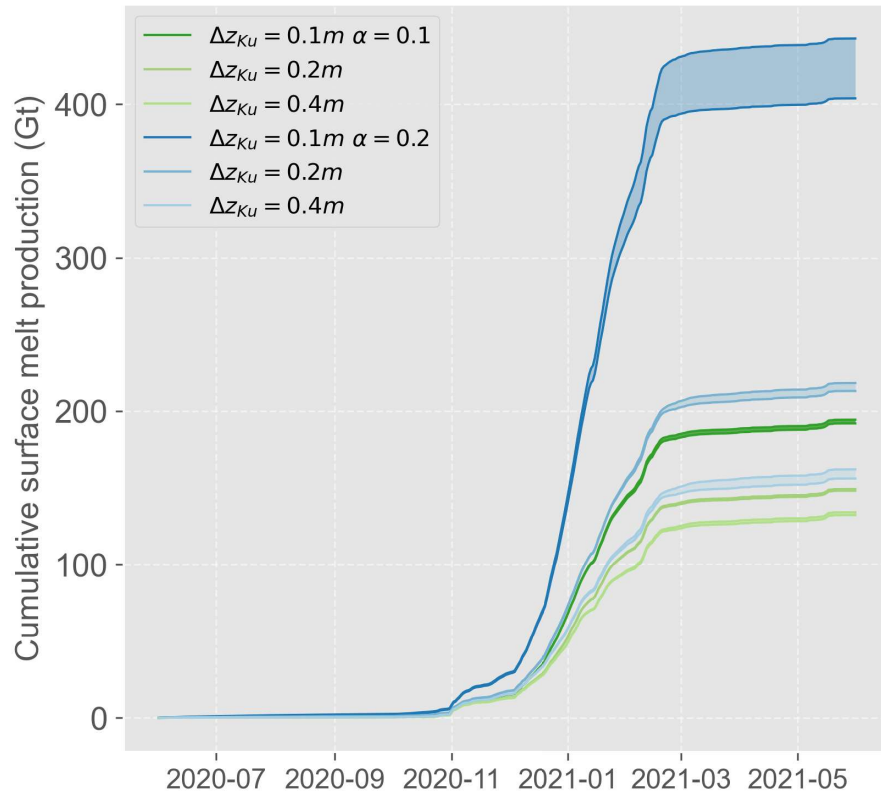

**Figure S 5.** Cumulative surface melt production (Gt) over the entire MAR domain for the 2020-2021 melt season as modeled by the different assimilation experiments. The assimilations are grouped by their  $\alpha$  and Ku-band  $\Delta_z$  thresholds. Shaded areas represent the range of the assimilation of the groups. Groups of assimilations with Ku-band  $\Delta_z = 0.1$  m produce more melt than the group of assimilations with the same  $\alpha$  but different  $\Delta_z$ .

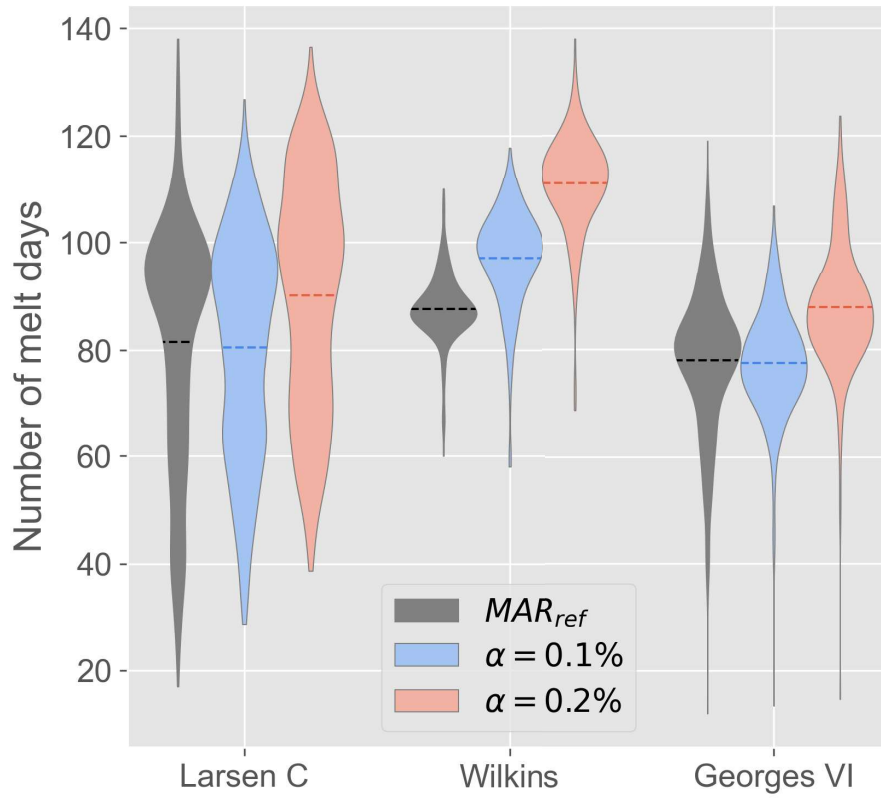

**Figure S 6.** Distribution of the number of melt days for the 2020-2021 melt season as modeled by  $MAR_{ref}$  and the assimilations grouped by the specified  $\alpha$  threshold values for the three studied ice shelves. Dashed lines represent the mean value of the distribution. On the three ice shelves, assimilations with  $\alpha = 0.2\%$  produce more melt days than  $MAR_{ref}$  and the other assimilations. Assimilations with  $\alpha = 0.2\%$  exhibit an increase in the mean number of melt days relative to  $MAR_{ref}$  over the Larsen C ice shelf of 15 days, 8 days on the Wilkins ice shelf, and 9 days on the Georges VI ice shelf.

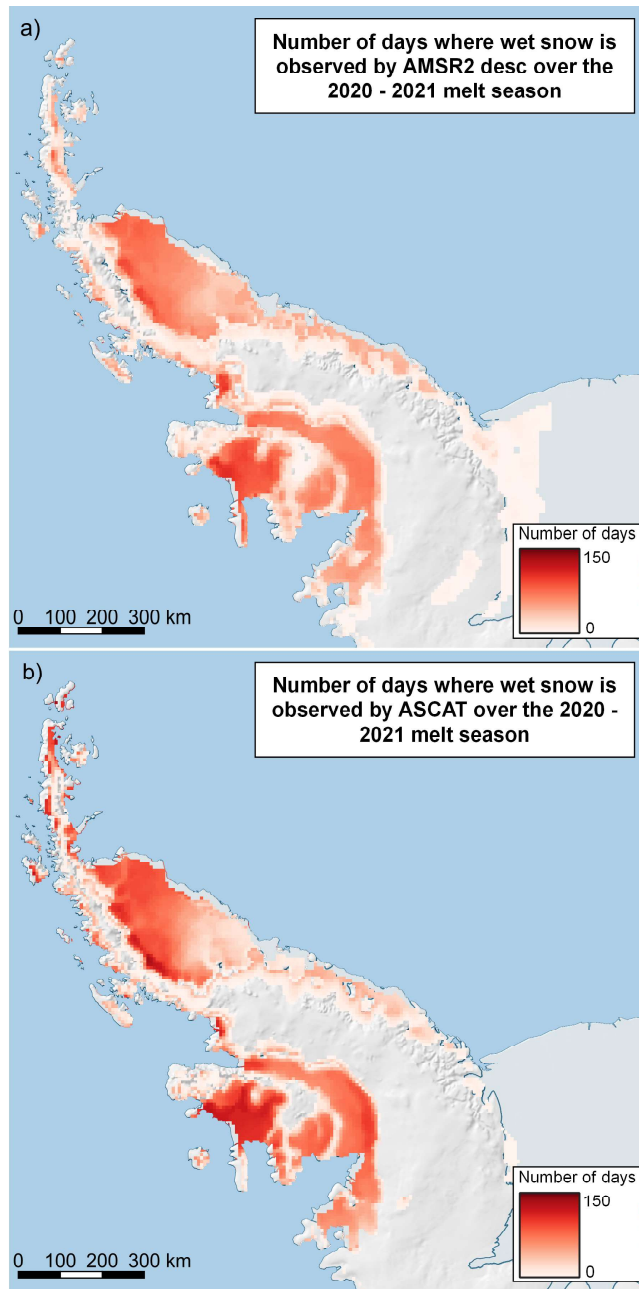

**Figure S 7.** (a) Number of days with wet snow observed by AMSR2 ascending on the AP for the 2020-2021 melt season. (b) Number of days with wet snow observed by ASCAT on the Antarctic Peninsula for the 2020-2021 melt season. ASCAT observes more wet snow than AMSR2 over the ice shelves but less melt on average at higher altitudes and in areas of steep terrain.



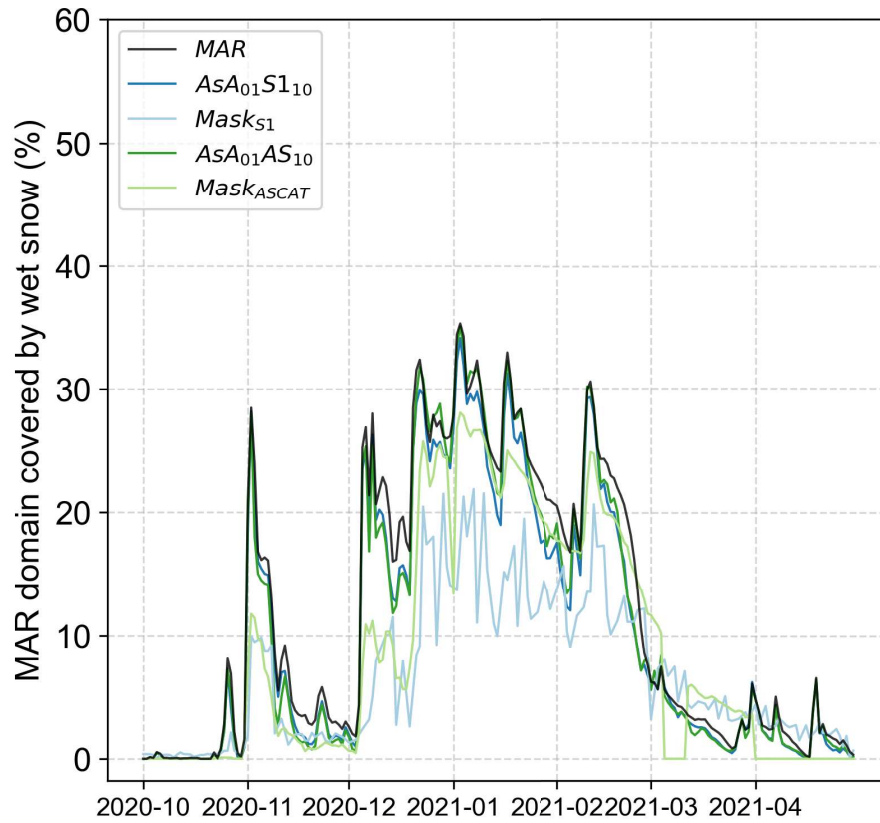

**Figure S 8.** Evolution of the wet-snow extent over the entire MAR domain (including grounded ice and ice shelves) during the 2020-2021 melt season as modeled by  $MAR_{ref}$ , the assimilation of S1 alone ( $AsA_{01}S1_{10}$ ), the assimilation of ASCAT alone ( $AsA_{01}AS_{10}$ ), and the wet-snow masks from S1, and ASCAT. The S1 wet-snow mask has a lower extent as the AP is not covered entirely every day by S1 images.

**Table S 1.** Difference (in  $\text{Gt yr}^{-1}$  and %) in surface meltwater production (ME), runoff (RU), refreezing (RZ), surface mass balance (SMB), snowpack liquid water content (LWC), and snowpack density ( $\rho$ ) between  $MAR_{ref}$  and the mean value of the assimilations ( $\overline{Assim}$ ) for 2020-2021 for the entire MAR spatial extent (including grounded ice and ice shelves). Variables are accumulated annually and over summer (November through April) except for snowpack density and the liquid water content which are averaged over the periods. LWC and  $\rho$  are the average within the first meter of the snowpack while the other variables are the total for the entire snowpack.

|                                    | Annual      |               |                    |           |              | Summer      |               |                    |           |              |
|------------------------------------|-------------|---------------|--------------------|-----------|--------------|-------------|---------------|--------------------|-----------|--------------|
|                                    | $MAR_{ref}$ | $Assim_{ref}$ | $\overline{Assim}$ | Range     | % Difference | $MAR_{ref}$ | $Assim_{ref}$ | $\overline{Assim}$ | Range     | % Difference |
| ME ( $\text{Gt yr}^{-1}$ )         | 111         | 149           | 168                | 132 - 218 | 51.1         | 109         | 147           | 165                | 130 - 215 | 51.1         |
| RU ( $\text{Gt yr}^{-1}$ )         | 36          | 49            | 52                 | 44 - 61   | 43.7         | 36          | 49            | 51                 | 44 - 61   | 43.8         |
| RZ ( $\text{Gt yr}^{-1}$ )         | 99          | 124           | 140                | 112 - 182 | 42.4         | 94          | 120           | 134                | 108 - 173 | 42.8         |
| SMB ( $\text{Gt yr}^{-1}$ )        | 559         | 546           | 544                | 534 - 551 | -2.7         | 365         | 352           | 349                | 340 - 357 | -4.2         |
| $LWC_{1m}$ ( $\text{g kg}^{-1}$ )  | 13          | 10            | 11                 | 8 - 15    | -19.5        | 23          | 17            | 18                 | 14 - 25   | -19.7        |
| $\rho_{1m}$ ( $\text{kg m}^{-3}$ ) | 413         | 427           | 428                | 425 - 431 | 3.6          | 424         | 440           | 441                | 437 - 446 | 4.0          |

**Table S 2.** Difference (in  $\text{Gt yr}^{-1}$  and %) in surface melt production (ME), runoff (RU), refreezing (RZ), surface mass balance (SMB), snowpack liquid water content (LWC), and snowpack density ( $\rho$ ) between  $MAR_{ref}$  and the mean value of the assimilations ( $\overline{Assim}$ ) over the three highlighted ice shelves in 2020-2021 using the regions shown in Fig. 1. Variables are accumulated annually and over summer (November through April) except for snowpack density and the liquid water content, which are averages over the specified periods. LWC and  $\rho$  are given as the average of the snowpack first meter while the other variables are totals for the entire modeled snowpack.

| Larsen C                           | Annual      |               |                    |           |                | Summer      |               |                    |           |                |
|------------------------------------|-------------|---------------|--------------------|-----------|----------------|-------------|---------------|--------------------|-----------|----------------|
|                                    | $MAR_{ref}$ | $Assim_{ref}$ | $\overline{Assim}$ | Range     | Difference (%) | $MAR_{ref}$ | $Assim_{ref}$ | $\overline{Assim}$ | Range     | Difference (%) |
| ME ( $\text{Gt yr}^{-1}$ )         | 30          | 41            | 47                 | 35 - 63   | 54.8           | 30          | 40            | 46                 | 34 - 62   | 55.2           |
| RU ( $\text{Gt yr}^{-1}$ )         | 6           | 9             | 11                 | 8 - 13    | 88.6           | 6           | 9             | 11                 | 8 - 13    | 88.6           |
| RZ ( $\text{Gt yr}^{-1}$ )         | 26          | 33            | 37                 | 26 - 54   | 43.6           | 25          | 32            | 36                 | 26 - 52   | 42.4           |
| SMB ( $\text{Gt yr}^{-1}$ )        | 20          | 16            | 14                 | 12 - 17   | -26.3          | 11          | 8             | 6                  | 4 - 8     | -45.9          |
| $LWC_{1m}$ ( $\text{g kg}^{-1}$ )  | 3.0         | 2.6           | 2.7                | 2.1 - 3.6 | -12.3          | 5.2         | 4.4           | 4.6                | 3.5 - 6.1 | -12.2          |
| $\rho_{1m}$ ( $\text{kg m}^{-3}$ ) | 531         | 569           | 574                | 562 - 589 | 8.1            | 574         | 610           | 615                | 604 - 630 | 7.1            |
| <b>Wilkins</b>                     |             |               |                    |           |                |             |               |                    |           |                |
| ME ( $\text{Gt yr}^{-1}$ )         | 6           | 9             | 10                 | 7 - 15    | 75.1           | 6           | 9             | 10                 | 7 - 15    | 76.2           |
| RU ( $\text{Gt yr}^{-1}$ )         | 1           | 4             | 4                  | 2 - 7     | 186.9          | 1           | 4             | 4                  | 2 - 7     | 186.9          |
| RZ ( $\text{Gt yr}^{-1}$ )         | 5           | 6             | 7                  | 6 - 10    | 31.4           | 5           | 6             | 7                  | 6 - 10    | 35.8           |
| SMB ( $\text{Gt yr}^{-1}$ )        | 6           | 4             | 3                  | 0 - 5     | -46.6          | 3           | 1             | 0                  | -2 - 2    | -91.8          |
| $LWC_{1m}$ ( $\text{g kg}^{-1}$ )  | 0.9         | 0.8           | 0.8                | 0.7 - 0.9 | -17.1          | 1.6         | 1.3           | 1.3                | 1.2 - 1.5 | -17.2          |
| $\rho_{1m}$ ( $\text{kg m}^{-3}$ ) | 537         | 590           | 589                | 573 - 605 | 9.7            | 571         | 637           | 640                | 621 - 657 | 12.0           |
| <b>Georges VI</b>                  |             |               |                    |           |                |             |               |                    |           |                |
| ME ( $\text{Gt yr}^{-1}$ )         | 10          | 13            | 15                 | 11 - 21   | 51.3           | 10          | 13            | 15                 | 11 - 20   | 51.0           |
| RU ( $\text{Gt yr}^{-1}$ )         | 2           | 3             | 3                  | 3 - 6     | 86.9           | 2           | 3             | 3                  | 3 - 6     | 86.9           |
| RZ ( $\text{Gt yr}^{-1}$ )         | 10          | 11            | 13                 | 10 - 18   | 38.2           | 9           | 11            | 13                 | 10 - 17   | 36.4           |
| SMB ( $\text{Gt yr}^{-1}$ )        | 11          | 10            | 10                 | 7 - 10    | -15.0          | 6           | 4             | 4                  | 2 - 5     | -29.8          |
| $LWC_{1m}$ ( $\text{g kg}^{-1}$ )  | 1.5         | 1.3           | 1.3                | 1.1 - 1.6 | -9.8           | 2.6         | 2.2           | 2.3                | 2.0 - 2.7 | -9.8           |
| $\rho_{1m}$ ( $\text{kg m}^{-3}$ ) | 529         | 563           | 556                | 553 - 563 | 5.2            | 566         | 602           | 596                | 591 - 602 | 5.2            |

**Table S 3.** The melt season length (first to last melt day) and number of melt days modeled for  $MAR_{ref}$  and the average for assimilation simulations grouped by  $\alpha$ -value over the three highlighted ice shelves in Fig. 1 for 2020-2021. A melt day over an ice shelf is a day where more than 10 % of the ice shelf is experiencing melt.

| Larsen C          | Melt season length (days) | Number of melt days modeled |
|-------------------|---------------------------|-----------------------------|
| $MAR_{ref}$       | 209                       | 113                         |
| $\alpha = 0.1 \%$ | 208                       | 116                         |
| $\alpha = 0.2 \%$ | 209                       | 127                         |
| Wilkins           | Melt season length (days) | Number of melt days modeled |
| $MAR_{ref}$       | 200                       | 99                          |
| $\alpha = 0.1 \%$ | 201                       | 119                         |
| $\alpha = 0.2 \%$ | 207                       | 132                         |
| GeorgesVI         | Melt season length (days) | Number of melt days modeled |
| $MAR_{ref}$       | 200                       | 98                          |
| $\alpha = 0.1 \%$ | 200                       | 95                          |
| $\alpha = 0.2 \%$ | 200                       | 113                         |
